# Bacterial tail anchors can target to the mitochondrial outer membrane

Güleycan Lutfullahoğlu Bal, Abdurrahman Keskin<sup>1</sup>, Ayşe Bengisu Seferoğlu, and Cory D. Dunn

Department of Molecular Biology and Genetics

Koç University

Sarıyer, İstanbul, 34450

Turkey

<sup>1</sup> Current affiliation:

Department of Biological Sciences

Columbia University

New York, NY 10027

Corresponding author:

Dr. Cory D. Dunn

Koç Üniversitesi

Fen Fakültesi

Rumelifeneri Yolu

Sarıyer, İstanbul 34450

Turkey

Email: [cdunn@ku.edu.tr](mailto:cdunn@ku.edu.tr)

Phone: +90 212 338 1449

Fax: +90 212 338 1559

## 1           **ABSTRACT**

2           During the generation and evolution of the eukaryotic cell, a proteobacterial  
3           endosymbiont was refashioned into the mitochondrion, an organelle that appears to  
4           have been present in the ancestor of all present-day eukaryotes. Mitochondria harbor  
5           proteomes derived from coding information located both inside and outside the  
6           organelle, and the rate-limiting step toward the formation of eukaryotic cells may have  
7           been development of an import apparatus allowing protein entry to mitochondria.  
8           Currently, a widely conserved translocon allows proteins to pass from the cytosol into  
9           mitochondria, but how proteins encoded outside of mitochondria were first directed to  
10          these organelles at the dawn of eukaryogenesis is not clear. Because several proteins  
11          targeted by a carboxyl-terminal tail anchor (TA) appear to have the ability to insert  
12          spontaneously into the mitochondrial outer membrane (OM), it is possible that self-  
13          inserting, tail-anchored polypeptides obtained from bacteria might have formed the  
14          first gate allowing proteins to access mitochondria from the cytosol. Here, we tested  
15          whether bacterial TAs are capable of targeting to mitochondria. In a survey of proteins  
16          encoded by the proteobacterium *Escherichia coli*, predicted TA sequences were  
17          directed to specific subcellular locations within the yeast *Saccharomyces cerevisiae*.  
18          Importantly, TAs obtained from DUF883 family members ElaB and YqjD were  
19          abundantly localized to and inserted at the mitochondrial OM. Our results support the  
20          notion that eukaryotic cells are able to utilize membrane-targeting signals present in  
21          bacterial proteins obtained by lateral gene transfer, and our findings make plausible a  
22          model in which mitochondrial protein translocation was first driven by tail-anchored  
23          proteins.

24

## 25           **KEYWORDS**

26           protein targeting, membrane insertion, eukaryogenesis, organelle biogenesis,  
27           endosymbiosis

28

## 29 **BACKGROUND**

30  
31 During the integration of an  $\alpha$ -proteobacterial endosymbiont within the eukaryotic cell,  
32 genes transferred to the (proto)nucleus were re-targeted to mitochondria, allowing  
33 these organelles to remain the location of crucial cellular processes [1-3]. In addition,  
34 other polypeptides that evolved within the eukaryotic lineage or that were acquired  
35 through lateral gene transfer from other organisms were directed to mitochondria [4-6].  
36 Across eukaryotes, the  $\beta$ -barrel Tom40 protein forms a pore by which proteins pass  
37 through the OM [7-9]. However, the Tom40 polypeptide seems to require already  
38 existing TOM complexes for mitochondrial insertion [10,11], giving rise to a “chicken or  
39 the egg” dilemma when considering how the TOM complex may have evolved.

40  
41 Several narratives might be proposed for how mitochondria first evolved the ability to  
42 transport proteins from the cytosol. In one scenario, an early translocation pore that  
43 was self-inserting at the mitochondrial surface might have allowed mitochondria to  
44 begin to import proteins, permitting the subsequent evolution of the translocon found  
45 in eukaryotes today [12]. Current evidence suggests that the self-insertion of tail-  
46 anchored proteins at the mitochondrial OM is possible [13-15], and some tail-anchored  
47 pro-apoptotic proteins appear to have the ability to generate membrane pores at  
48 mitochondria [16,17], making tenable such a scenario for the evolution of mitochondrial  
49 protein import. At the inception of mitochondria, such tail-anchored proteins would  
50 likely have been derived from prokaryotes, particularly if mitochondria were required for  
51 the generation of the stereotypical compartmentalized structure of eukaryotes.

52  
53 We focused our attention upon a single aspect of this hypothesis: can TAs obtained  
54 from bacterial proteins be inserted into the mitochondrial OM when expressed within a  
55 eukaryotic cell? Indeed, our results demonstrate insertion and function at the  
56 mitochondrial OM for predicted TAs encoded by the proteobacterium *E. coli*, and we  
57 describe the relevance of our findings to the concept of lateral gene transfer during  
58 eukaryogenesis.

59 **RESULTS**

60

61 **Bacterial Tail Anchors Can Localize to Mitochondria**

62

63 To test whether predicted bacterial TAs might have the capacity to be inserted at the  
64 mitochondrial OM, we identified 12 *E. coli* proteins predicted to harbor a solitary  $\alpha$ -  
65 helical transmembrane (TM) domain at the polypeptide carboxyl-terminus (Fig. S1),  
66 then fused mCherry to the amino-terminus of these TAs and examined their location in  
67 *S. cerevisiae* cells by fluorescence microscopy. mCherry-ElaB(TA) (Fig. 1A) and  
68 mCherry-YqjD(TA) (Fig. 1B) were readily detectable at mitochondria, as reported by co-  
69 localization with superfolder GFP (sfGFP) [18] fused to the TA of the *S. cerevisiae* Fis1  
70 polypeptide, a protein playing a role in yeast mitochondrial division. A lesser fraction of  
71 mCherry-ElaB(TA) and mCherry-YqjD(TA) was localized to the endoplasmic reticulum  
72 (Fig. S2). ElaB and YqjD are members of the DUF883 family of proteins. Little is known  
73 about the function of DUF883 family members, but YqjD may recruit ribosomes to the  
74 *E. coli* plasma membrane during stationary phase [19]. Although negligible fluorescent  
75 signal was detectable by microscopy or flow cytometry (C. Dunn, unpublished results),  
76 mCherry-TcdA(TA) could also be visualized at mitochondria (Fig. S3A). TcdA (also  
77 called CsdL) catalyzes the modification of *E. coli* tRNAs [20].

78

79 Other predicted TAs derived from the *E. coli* Flk, YgiM, RfaJ, DjlB, FdnH, NrfR, and  
80 YmiA proteins appeared to allow at least partial localization of mCherry to various  
81 locations associated with the endomembrane system (Fig. S4). However, no  
82 convincing localization to mitochondria was apparent after fusing any of these TAs to  
83 mCherry. Moreover, mCherry-YhdV(TA) appeared to be distributed throughout cytosol  
84 and nucleus, indicating failure to target efficiently to any membrane. mCherry-  
85 YgaM(TA) was not detectable, suggesting its degradation.

86

87



## 88 **Bacterial Tail Anchors Can Insert into Membranes in a Eukaryotic Cell**

89

90 Previously, we developed an assay in which membrane insertion of proteins might be  
91 examined by a proliferation-based assay [21]. In brief, the Gal4 transcription factor is  
92 linked to a protein of interest that is thought to be membrane inserted outside of the  
93 nucleus. Failure of this fusion protein to insert at its target membrane can allow the  
94 Gal4-linked fusion protein to access the nucleus and activate Gal4-responsive  
95 promoters that drive proliferation under selective conditions. As previously  
96 demonstrated [21], while a membrane-sequestered Gal4-sfGFP-Fis1 fusion protein did  
97 not lead to a proliferation defect on non-selective medium (SC-Trp), cells carrying this  
98 construct could not survive on medium requiring activation of a Gal4p-driven *HIS3*  
99 gene (SMM-His+20mM 3-AT) (Fig. 2). Deletion of the Fis1p TA, or the presence of a  
100 A144D charge substitution within the Fis1p TA, led to a failure of membrane insertion  
101 at mitochondria, translocation to the nucleus, and Gal4-dependent proliferation on  
102 selective medium. When the TA of Fis1p, a domain whose sole purpose is to allow this  
103 protein's insertion at the mitochondrial OM [21,22], was replaced with the TA of either  
104 ElaB or YqjD, cells were unable to proliferate on medium selective for histidine  
105 synthesis, consistent with ElaB and YqjD TA insertion at the mitochondrial OM.

106

## 107 **Bacterial Tail Anchors Can Function at the Mitochondrial Outer Membrane**

108

109 As these findings indicated that the ElaB and YqjD TAs may be competent for  
110 mitochondrial insertion, we tested whether these TAs can functionally replace the  
111 membrane-bound TA of Fis1p, thereby allowing Fis1p to promote mitochondrial  
112 division. Because Fis1p is required for mitochondrial fission in *S. cerevisiae*, mutants  
113 lacking this protein manifest a highly interconnected network of mitochondria due to  
114 unbalanced mitochondrial fusion [23-25]. As expected, expression of wild-type Fis1p  
115 restored normal mitochondrial distribution in this genetic background, while Fis1p  
116 prevented from mitochondrial insertion by a A144D substitution within the Fis1p TA

117 [21] could not restore normal mitochondrial morphology (Figs. 3A and 3B). Strikingly,  
118 replacement of the Fis1p TA with the ElaB or the YqjD TA within the context of full  
119 length Fis1p polypeptide could successfully promote mitochondrial division and  
120 restore normal mitochondrial morphology. A control TA obtained from the *E. coli* YgiM  
121 protein, which is not trafficked to mitochondria, could not support Fis1p activity. In  
122 addition, a Fis1-TcdA(TA) protein could not functionally replace the Fis1p TA in this  
123 microcopy-based assay (Fig. S3B), suggesting insufficient expression, poor  
124 mitochondrial insertion, or meager functionality.

125

126 We then sought further evidence for functional insertion of the ElaB and YqjD TAs at  
127 the mitochondrial OM using an assay based on cell proliferation [21]. Expression of  
128 functional Fis1p in a genetic background initially lacking Fis1p and removed of the  
129 mitochondrial fusogen Fzo1p can lead to unchecked mitochondrial fragmentation, loss  
130 of functional mitochondrial DNA (mtDNA), and a corresponding abrogation of  
131 respiratory competence [26-29]. As previously reported [21], expression of wild-type  
132 Fis1p in a *fzo1Δ fis1Δ* genetic background led to an inability to proliferate on  
133 nonfermentable medium, while expression of the poorly inserted Fis1(A144D) variant  
134 did not prompt mtDNA loss (Fig. 3C). The ElaB and YqjD TAs fused to the cytosolic  
135 domain of Fis1p allowed sufficient fission activity to prompt mitochondrial genome loss  
136 from the same genetic background, again indicating successful ElaB TA and YqjD TA  
137 insertion at the mitochondrial OM. Even the Fis1-TcdA(TA) protein provoked mtDNA  
138 loss in *fzo1Δ fis1Δ* cells (Fig. S3C), suggesting some minimal level of OM insertion, and  
139 the YgiM TA again appeared unable to recruit Fis1p to mitochondria (Fig. 3C).  
140 Together, our results demonstrate insertion of the bacterial ElaB and YqjD TAs at the  
141 mitochondrial surface of a eukaryotic cell.

142 **DISCUSSION**

143

144 Our findings, in which several predicted TAs obtained from *E. coli* can target to and  
145 function at the mitochondrial OM of *S. cerevisiae*, make plausible a scenario in which  
146 tail-anchored bacterial proteins contributed to the formation of the earliest  
147 mitochondrial translocon. The structural characteristics of the TAs of ElaB and YqjD, a  
148 helical TM domain rich in glycines followed by a positively charged patch ending in di-  
149 arginine (Fig. S1), are evocative of the Fis1p TA, suggesting a similar, potentially  
150 spontaneous mechanism for insertion at mitochondria, although unassisted insertion of  
151 the ElaB and YqjD TAs at the mitochondrial surface has yet to be demonstrated.  
152 Notably, several conserved members of the current TOM complex are also tail-  
153 anchored [30], raising the possibility that at least some of these proteins could be  
154 "hold-overs" from an early, self-inserting mitochondrial translocon, although we note  
155 that these subunits cannot currently self-insert at mitochondria.

156

157 Could the DUF883 family of proteins have contributed to an ancestral mitochondrial  
158 OM translocon? While YqjD has been reported to recruit ribosomes to the *E. coli* inner  
159 membrane during stationary phase [19], a role in line with promotion of co-translational  
160 protein import into mitochondria [31,32], the DUF883 family is not readily identified in  
161 eukaryotic genomes. One might expect, however, that once a more proficient TOM  
162 complex centered around the Tom40 pore evolved, a previous translocon would have  
163 been lost, or even selected against if it were to interfere with more rapid protein import  
164 through an improved OM translocation machinery. Moreover, an inordinate focus on  
165 DUF883 family members when seeking components of the earliest mitochondrial  
166 translocon may not be warranted in any case, since the structural characteristics likely  
167 required for TA insertion at mitochondria might be easily generated from random open  
168 reading frame fragments containing a transmembrane domain. Analogously, random  
169 sequences from bacteria are readily able to act as amino-terminal mitochondrial  
170 targeting sequences [33-35]. If TAs are easily evolved and might recruit other

171 functional domains to the mitochondrial surface, then identifying orthologs of initial tail-  
172 anchored translocon components from existing prokaryotic sequences might be  
173 difficult, since an untold number of TAs might be predicted among putative open-  
174 reading frames. Supporting the idea that mitochondrial TAs might be generated from  
175 sequences not actually functioning in membrane targeting within their native bacterial  
176 environment, we demonstrated limited mitochondrial targeting and partial functionality  
177 of the computationally predicted TcdA TA in yeast, even though TcdA is unlikely to be  
178 membrane-inserted in *E. coli* [36].

179

180 If conversion of endosymbiont to mitochondria were the rare and essential event  
181 required for generation of eukaryotes, and if insertion of bacteria-derived, tail-anchored  
182 proteins at the OM to form an ancestral translocon were necessary for this conversion,  
183 then the question of how hospitable an environment the early mitochondria OM might  
184 have been for bacteria-derived TAs comes to the fore. Indeed, the membrane into  
185 which tail-anchored proteins are inserted can be at least partially determined by their  
186 lipid environment [13], and lipids utilized by many characterized archaea are  
187 fundamentally different in structure from bacterial and eukaryotic lipids [37]. However,  
188 recent evidence indicates that archaeal clades potentially related to the last eukaryotic  
189 common ancestor might have been characterized by membranes more similar to those  
190 of bacteria than of those membranes more typically found in archaea [38]. This finding  
191 raises the possibility that the protoeukaryote's specific cohort of lipids was crucial to  
192 the ability to form complexes of bacteria-derived tail-anchored proteins at the  
193 mitochondrial OM that would allow full integration of mitochondria within the ancestral  
194 eukaryote.

195

196 Finally, we have not examined in detail the trafficking of *E. coli* TAs that appeared to  
197 localize to the endomembrane system during our initial survey. However, the diverse  
198 organellar locations to which these TAs were localized supports previous data  
199 indicating that eukaryotes may derive organelle targeting information from newly  
200 acquired prokaryotic proteins or protein fragments, perhaps even from amino acid

201 sequences previously unselected for targeting proficiency [33-35,39,40]. Lateral gene  
202 transfer promotes the evolution of novel functions in prokaryotes [41] and was  
203 certainly present in the form of endosymbiotic gene transfer during early  
204 eukaryogenesis. Indeed, proficiency in making use of cryptic or explicit targeting  
205 information in order to direct newly acquired, nucleus-encoded proteins to the distinct  
206 subcellular locations where they might be best utilized might have provided a  
207 significant selective advantage to the early eukaryote. Such a scenario may be  
208 particularly relevant if some amount of cellular compartmentalization already existed in  
209 a pre-eukaryotic host cell before conversion of pre-mitochondrial endosymbiont to  
210 organelle [42,43].

211  
212 **CONCLUSIONS**  
213

214 We have demonstrated that TAs from bacteria can localize to and insert within the  
215 mitochondrial OM. Our results make plausible the suggestion that tail-anchored  
216 proteins acquired by bacteria could have formed an initial translocon at the  
217 mitochondrial outer membrane, and our findings indicate that membrane-bound  
218 proteins acquired by horizontal gene transfer could have easily found their way to  
219 diverse locations within eukaryotic cells at which they might provide a selective  
220 advantage. Further efforts will be necessary to determine whether self-inserting  
221 proteins or peptides may have generated the initial mitochondrial translocon.

222 **METHODS**

223

224 **Yeast strains, plasmids, and culture conditions**

225

226 Culture conditions are as described in [21], and all experiments have been carried out  
227 at 30°C. Strains, plasmids, and oligonucleotides used in this study are found in  
228 Supplementary Information 1.

229

230 **Selection of *E. coli* tail anchors subject to investigation**

231

232 FASTA sequences from the *E. coli* proteome were retrieved from UniProt [44] and  
233 subjected to analysis using the TMHMM 2.0 server [45]. Polypeptides with a single  
234 predicted TM domain (denoted by purple line), harboring 15 or less amino acids  
235 carboxyl-terminal to the TM domain, and containing more than 30 amino acids amino-  
236 terminal to the TM domain were selected for further analysis.

237

238 **Microscopy**

239

240 Microscopy was performed on logarithmic phase cultures as in [21], with exposure  
241 times determined automatically. mCherry fusions are driven by the *ADH1* promoter and  
242 universally contain Fis1p amino acids 119-128 (not necessary or sufficient for  
243 mitochondrial targeting) linking mCherry to each TA, and genetic assessment of Fis1p  
244 variant functionality was performed as described in [21]. The brightness of all images of  
245 mCherry expression was adjusted in Adobe Photoshop CS5 (Adobe, San Jose,  
246 California) to an equivalent extent. Scoring of mitochondrial morphology was  
247 performed blind to genotype.

248

249 **Proliferation-based assessment of Fis1p insertion and functionality**

250

251 Genetic tests of Fis1p insertion and functionality were performed as in [21].

252 **LIST OF ABBREVIATIONS**

253

254 TA - tail anchor

255 mtDNA - mitochondrial DNA

256 OM- outer membrane

257 TM - transmembrane

258 sfGFP - superfolder GFP

259

260 **DECLARATIONS**

261

262 *Ethics approval and consent to participate*

263 None required.

264

265 *Consent for publication*

266 None required.

267

268 *Availability of data and material*

269 All data generated or analysed during this study are included in this published article

270 and its supplementary information files.

271

272 *Competing interests*

273 The authors declare that they have no competing interests.

274

275 *Funding*

276 This work was supported by a European Research Council Starting Grant (637649-

277 RevMito) to C.D.D., by a Turkish Academy of Sciences Outstanding Young Scientist

278 Award (TÜBA-GEBİP) to C.D.D., and by Koç University. These funding bodies had no

279 role in the design of the study, data collection, data analysis, data interpretation, or

280 manuscript preparation.

281

282 *Authors contributions*

283 C.D.D. designed the study, wrote the manuscript, and performed experiments. G.L.B.,  
284 A.K., and A.B.S. performed experiments, generated reagents, and provided manuscript  
285 critiques. All authors read and approved the final manuscript.

286

287 *Acknowledgements*

288 We thank Thomas Richards and Jeremy Wideman for comments on this manuscript.

289



290 **REFERENCES**

291

292 1. Booth A, Doolittle WF. Eukaryogenesis, how special really? Proceedings of the  
293 National Academy of Sciences. National Acad Sciences; 2015;112:10278–85.

294 2. Hewitt V, Alcock F, Lithgow T. Minor modifications and major adaptations: The  
295 evolution of molecular machines driving mitochondrial protein import. BBA -  
296 Biomembranes. Elsevier B.V; 2011;1808:947–54.

297 3. Gray MW. Mosaic nature of the mitochondrial proteome: Implications for the origin  
298 and evolution of mitochondria. Proceedings of the National Academy of Sciences.  
299 National Acad Sciences; 2015;112:10133–8.

300 4. De Duve C. The origin of eukaryotes: a reappraisal. Nature Reviews Genetics.  
301 2007;8:395–403.

302 5. Kurland CG, Collins LJ, Penny D. Genomics and the Irreducible Nature of Eukaryote  
303 Cells. Science. American Association for the Advancement of Science; 2006;312:1011–  
304 4.

305 6. Gabaldón T, Huynen MA. Reconstruction of the proto-mitochondrial metabolism.  
306 Science. American Association for the Advancement of Science; 2003;301:609–9.

307 7. Mani J, Meisinger C, Schneider A. Peeping at TOMs-Diverse Entry Gates to  
308 Mitochondria Provide Insights into the Evolution of Eukaryotes. Mol Biol Evol. Oxford  
309 University Press; 2016;33:337–51.

310 8. Shiota T, Imai K, Qiu J, Hewitt VL, Tan K, Shen H-H, et al. Molecular architecture of  
311 the active mitochondrial protein gate. Science. 2015;349:1544–8.

312 9. Hill K, Model K, Ryan MT, Dietmeier K, Martin F, Wagner R, et al. Tom40 forms the  
313 hydrophilic channel of the mitochondrial import pore for preproteins [see comment].  
314 Nature. 1998;395:516–21.

315 10. Rapaport D, Neupert W. Biogenesis of Tom40, core component of the TOM  
316 complex of mitochondria. J Cell Biol. 1999;146:321–31.

317 11. Model K, Meisinger C, Prinz T, Wiedemann N, Truscott KN, Pfanner N, et al.  
318 Multistep assembly of the protein import channel of the mitochondrial outer membrane.  
319 Nat. Struct. Biol. 2001;8:361–70.

320 12. Renthal R. Helix insertion into bilayers and the evolution of membrane proteins.  
321 Cell. Mol. Life Sci. SP Birkhäuser Verlag Basel; 2009;67:1077–88.

322 13. Krumpe K, Frumkin I, Herzig Y, Rimon N, Özbalci C, Brügger B, et al. Ergosterol  
323 content specifies targeting of tail-anchored proteins to mitochondrial outer

- 324 membranes. *Mol Biol Cell*. 2012;23:3927–35.
- 325 14. Kemper C, Habib SJ, Engl G, Heckmeyer P, Dimmer KS, Rapaport D. Integration of  
326 tail-anchored proteins into the mitochondrial outer membrane does not require any  
327 known import components. *Journal of Cell Science*. The Company of Biologists Ltd;  
328 2008;121:1990–8.
- 329 15. Setoguchi K, Otera H, Mihara K. Cytosolic factor- and TOM-independent import of  
330 C-tail-anchored mitochondrial outer membrane proteins. *EMBO J*. EMBO Press;  
331 2006;25:5635–47.
- 332 16. Große L, Wurm CA, Brüser C, Neumann D. Bax assembles into large ring-like  
333 structures remodeling the mitochondrial outer membrane in apoptosis. *The EMBO ....*  
334 2016.
- 335 17. Salvador-Gallego R, Mund M, Cosentino K, Schneider J, Unsay J, Schraermeyer U,  
336 et al. Bax assembly into rings and arcs in apoptotic mitochondria is linked to  
337 membrane pores. *EMBO J*. 2016;35:389–401.
- 338 18. Pédelacq J-D, Cabantous S, Tran T, Terwilliger TC, Waldo GS. Engineering and  
339 characterization of a superfolder green fluorescent protein. *Nat Biotechnol*.  
340 2005;24:79–88.
- 341 19. Yoshida H, Maki Y, Furuike S, Sakai A, Ueta M, Wada A. YqjD is an inner  
342 membrane protein associated with stationary-phase ribosomes in *Escherichia coli*. *J*  
343 *Bacteriol*. American Society for Microbiology; 2012;194:4178–83.
- 344 20. Miyauchi K, Kimura S, Suzuki T. A cyclic form of N6-threonylcarbamoyladenine  
345 as a widely distributed tRNA hypermodification. *Nature Chemical Biology*. Nature  
346 Publishing Group; 2012;:1–9.
- 347 21. Keskin A, Akdoğan E, Dunn CD. Evidence for Amino Acid Snorkeling from a High-  
348 Resolution, In Vivo Analysis of Fis1 Tail Anchor Insertion at the Mitochondrial Outer  
349 Membrane. *Genetics*. 2017.
- 350 22. Habib SJ, Vasiljev A, Neupert W, Rapaport D. Multiple functions of tail-anchor  
351 domains of mitochondrial outer membrane proteins. *FEBS Lett*. 2003;555:511–5.
- 352 23. Mozdy AD, McCaffery JM, Shaw JM. Dnm1p GTPase-mediated mitochondrial  
353 fission is a multi-step process requiring the novel integral membrane component Fis1p.  
354 *J Cell Biol*. 2000;151:367–80.
- 355 24. Fekkes P, Shepard KA, Yaffe MP. Gag3p, an outer membrane protein required for  
356 fission of mitochondrial tubules. *J Cell Biol*. 2000;151:333–40.
- 357 25. Tieu Q, Nunnari J. Mdv1p is a WD repeat protein that interacts with the dynamin-  
358 related GTPase, Dnm1p, to trigger mitochondrial division. *J Cell Biol*. 2000;151:353–66.

- 359 26. Hermann GJ, Thatcher JW, Mills JP, Hales KG, Fuller MT, Nunnari J, et al.  
360 Mitochondrial fusion in yeast requires the transmembrane GTPase Fzo1p. *J Cell Biol.*  
361 1998;143:359–73.
- 362 27. Rapaport D, Brunner M, Neupert W, Westermann B. Fzo1p is a mitochondrial outer  
363 membrane protein essential for the biogenesis of functional mitochondria in  
364 *Saccharomyces cerevisiae*. *J Biol Chem.* 1998;273:20150–5.
- 365 28. Bleazard W, McCaffery JM, King EJ, Bale S, Mozdy A, Tieu Q, et al. The dynamin-  
366 related GTPase Dnm1 regulates mitochondrial fission in yeast. *Nat Cell Biol.* 1999 ed.  
367 1999;1:298–304.
- 368 29. Sesaki H, Jensen RE. Division versus fusion: Dnm1p and Fzo1p antagonistically  
369 regulate mitochondrial shape. *J Cell Biol.* 1999;147:699–706.
- 370 30. Burri L, Lithgow T. A Complete Set of SNAREs in Yeast. *Traffic.* 2003;5:45–52.
- 371 31. Verner K. Co-translational protein import into mitochondria: an alternative view.  
372 *Trends in Biochemical Sciences.* 1993;18:366–71.
- 373 32. Williams CC, Jan CH, Weissman JS. Targeting and plasticity of mitochondrial  
374 proteins revealed by proximity-specific ribosome profiling. *Science.* American  
375 Association for the Advancement of Science; 2014;346:748–51.
- 376 33. Baker A, Schatz G. Sequences from a prokaryotic genome or the mouse  
377 dihydrofolate reductase gene can restore the import of a truncated precursor protein  
378 into yeast mitochondria. *Proc Natl Acad Sci USA.* National Acad Sciences;  
379 1987;84:3117–21.
- 380 34. Lemire BD, Fankhauser C, Baker A, Schatz G. The mitochondrial targeting function  
381 of randomly generated peptide sequences correlates with predicted helical  
382 amphiphilicity. *J Biol Chem.* American Society for Biochemistry and Molecular Biology;  
383 1989;264:20206–15.
- 384 35. Lucattini R, Likic VA, Lithgow T. Bacterial proteins predisposed for targeting to  
385 mitochondria. *Mol Biol Evol.* Oxford University Press; 2004;21:652–8.
- 386 36. Kim S, Lee H, Park S. The Structure of *Escherichia coli* TcdA (Also Known As CsdL)  
387 Reveals a Novel Topology and Provides Insight into the tRNA Binding Surface  
388 Required for N6-Threonylcarbamoyl-adenosine Dehydratase Activity. *J Mol Biol.*  
389 Elsevier Ltd; 2015;427:3074–85.
- 390 37. Lombard J, López-García P, Moreira D. The early evolution of lipid membranes and  
391 the three domains of life. *Nat Rev Microbiol.* Nature Publishing Group; 2012;10:507–15.
- 392 38. Villanueva L, Schouten S, Damsté JSS. Phylogenomic analysis of lipid biosynthetic  
393 genes of Archaea shed light on the “lipid divide.” *Environ Microbiol.* 2016;19:54–69.

- 394 39. Hall J, Hazlewood GP, Surani MA, Hirst BH, Gilbert HJ. Eukaryotic and prokaryotic  
395 signal peptides direct secretion of a bacterial endoglucanase by mammalian cells. *J*  
396 *Biol Chem.* 1990;265:19996–9.
- 397 40. Walther DM, Papic D, Bos MP, Tommassen J, Rapaport D. Signals in bacterial  
398 beta-barrel proteins are functional in eukaryotic cells for targeting to and assembly in  
399 mitochondria. *Proceedings of the National Academy of Sciences. National Acad*  
400 *Sciences;* 2009;106:2531–6.
- 401 41. Treangen TJ, Rocha EPC. Horizontal Transfer, Not Duplication, Drives the  
402 Expansion of Protein Families in Prokaryotes. Moran NA, editor. *PLoS Genet. Public*  
403 *Library of Science;* 2011;7:e1001284–12.
- 404 42. Pittis AA, Gabaldón T. Late acquisition of mitochondria by a host with chimaeric  
405 prokaryotic ancestry. *Nature.* 2016;531:101–4.
- 406 43. Zaremba-Niedzwiedzka K, Caceres EF, Saw JH, Bäckström D, Juzokaite L,  
407 Vancaester E, et al. Asgard archaea illuminate the origin of eukaryotic cellular  
408 complexity. *Nature.* Nature Publishing Group; 2017;541:353–8.
- 409 44. The UniProt Consortium. UniProt: the universal protein knowledgebase. *Nucleic*  
410 *Acids Res. Oxford University Press;* 2017;45:D158–69.
- 411 45. Krogh A, Larsson B, Heijne von G, Sonnhammer ELL. Predicting transmembrane  
412 protein topology with a hidden markov model: application to complete  
413 genomes<sup>11</sup> Edited by F. Cohen. *J Mol Biol.* 2001;305:567–80.
- 414 46. DeLoache WC, Russ ZN, Dueber JE. Towards repurposing the yeast peroxisome  
415 for compartmentalizing heterologous metabolic pathways. *Nature Communications.*  
416 *Nature Publishing Group;* 2016;7:1–11.
- 417
- 418

419 **FIGURE LEGENDS**

420

421 **Figure 1. The predicted ElaB and YqjD TAs localize to mitochondria.** Strain  
422 BY4741, harboring plasmid b294 (sfGFP-Fis1p), was mated to strain BY4742 carrying  
423 mCherry-ElaB(TA)-expressing plasmid b275 (A) or strain BY4742 carrying mCherry-  
424 YqjD(TA)-expressing plasmid b279 (B). The resulting diploids were visualized by  
425 fluorescence microscopy. Scale bar, 5 $\mu$ m.

426

427 **Figure 2. A proliferation-based assay suggests that the ElaB and YqjD TAs are**  
428 **membrane inserted.** Strain MaV203, containing a Gal4-activated *HIS3* gene, was  
429 transformed with plasmids expressing Gal4-sfGFP-Fis1p (plasmid b100), a variant  
430 lacking the Fis1p TA (plasmid b101), a mutant containing the A144D charge  
431 substitution in its TA (b180), or the Gal4-sfGFP-Fis1p construct with the Fis1p TA  
432 replaced with that of either ElaB (b313) or YqjD (b314). MaV203 was also transformed  
433 with empty vector pKS1. Transformants were cultured in SC-Trp medium, then,  
434 following serial dilution, spotted to SC-Trp or SMM-His + 20 mM 3-AT and incubated  
435 for 2 d.

436

437 **Figure 3. Mitochondria-localized bacterial TAs can functionally replace the TA of**  
438 **Fis1p.** (A) The ElaB and YqjD TAs can replace the Fis1p TA in promotion of normal  
439 mitochondrial morphology. *fis1 $\Delta$*  strain CDD741, expressing mitochondria-targeted  
440 GFP from plasmid pHS12, was transformed with empty vector pRS313 or plasmids  
441 expressing wild-type Fis1p (b239), Fis1(A144D)p (b244), or Fis1p with its own TA  
442 replaced by that of ElaB (b317), YqjD (b318), or YgiM (b316). Cells were examined by  
443 fluorescence microscopy. Scale bar, 5 $\mu$ m. (B) Quantification of mitochondrial  
444 morphology of the transformants from (A) was performed blind to genotype. White bar  
445 represents cells with fully networked mitochondria, grey bar represents cells with  
446 mitochondria not fully networked, but networked to a greater extent than wild-type  
447 cells, and black bar represents cells with normal mitochondrial morphology.  
448 Quantification was repeated three times (n>200 per genotype), and a representative

449 experiment is shown. (C) Genetic assessment of Fis1p variant functionality. Strain  
450 CDD688 was transformed with the plasmids in (A) and proliferation was assessed  
451 without selection against Fis1p activity (YPALac medium for 2 d) and following  
452 counter-selection for cells carrying functional Fis1p (SLac-His+CHX medium for 4 d).  
453

454 **SUPPLEMENTAL FIGURE LEGENDS**

455

456 **Supplemental Figure 1. A list of predicted TAs examined in this study.** The UniProt  
457 accession number and names of selected proteins are provided, along with the  
458 sequences of the predicted TAs. Charged amino acids are also denoted. For purposes  
459 of sequence comparison, the relevant portion of the *S. cerevisiae* Fis1p TA is also  
460 shown.

461

462 **Supplemental Figure 2. The predicted ElaB and YqjD TAs can also be visualized at**  
463 **the endoplasmic reticulum.** Cells were analyzed as in Figure 1, except BY4741 was  
464 transformed with plasmid pJK59, expressing Sec63-GFP, before mating.

465

466 **Supplemental Figure 3. The predicted TcdA TA allows minimal localization to, and**  
467 **function at, the mitochondrial outer membrane.** (A) The predicted TcdA TA can be  
468 visualized at mitochondria. Strain BY4741, harboring plasmid b294 (sfGFP-Fis1p), was  
469 mated to strain BY4742 carrying mCherry-TcdA(TA)-expressing plasmid b281 and the  
470 resulting diploids were imaged by fluorescence microscopy. Scale bar, 5  $\mu$ m. (B) Fis1p  
471 with its own TA replaced by the predicted TcdA TA cannot promote normal  
472 mitochondrial morphology. *fis1 $\Delta$*  strain CDD741, expressing mitochondria-targeted  
473 GFP from plasmid pHS12, was transformed with empty vector pRS313 or plasmids  
474 expressing wild-type Fis1p (b239), Fis1(A144D)p (b244), or Fis1-TcdA(TA)p (b319) and  
475 mitochondrial morphology was assessed by fluorescence microscopy. Scale bar, 5 $\mu$ m.  
476 (C) Fis1-TcdA(TA)p can allow mitochondrial division. Strain CDD688 was transformed  
477 with the plasmids used in (B) or a plasmid expressing Fis1-YgiM(TA)p (b316) and  
478 examined as in Fig. 2C, except that culture on medium counter-selective for Fis1p  
479 activity was carried out for 5 d.

480

481 **Supplemental Figure 4. Not all predicted *E. coli* TAs are localized to mitochondria**  
482 **in *S. cerevisiae*.** Strain CDD961 was transformed with plasmids expressing (A)  
483 mCherry-FIk(TA) (b273), (B) mCherry-YhdV(TA) (b277), (C) mCherry-RfaJ(RA) (b278), (D)

484 mCherry-DjIB(TA) (b280), (E) mCherry-FdnH(TA) (b331), (F) mCherry-NrfF(TA) (b332), (G)  
485 mCherry-YmiA(TA) (b333) and examined by fluorescence microscopy. (H) Strain  
486 BY4741, carrying plasmid b311 expressing sfGFP fused to the enhanced PTS1  
487 sequence [46], was mated to strain BY4742, containing the mCherry-YgiM(TA)-  
488 expressing plasmid b274, and the resulting diploids were imaged.

489

490 **Supplementary Information 1. Strains, plasmids, and oligonucleotides used**  
491 **during this study.**



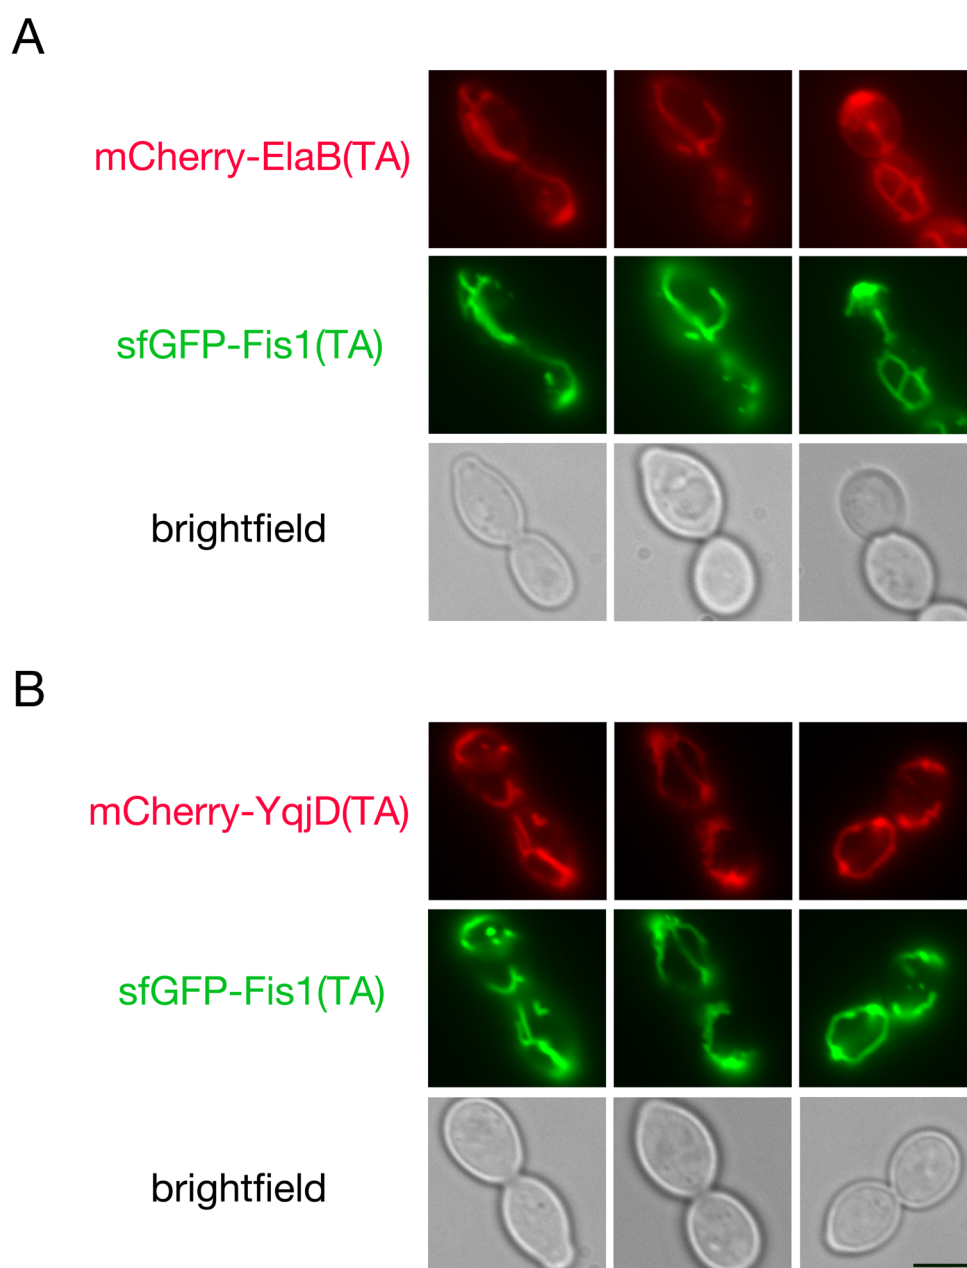

Figure 1

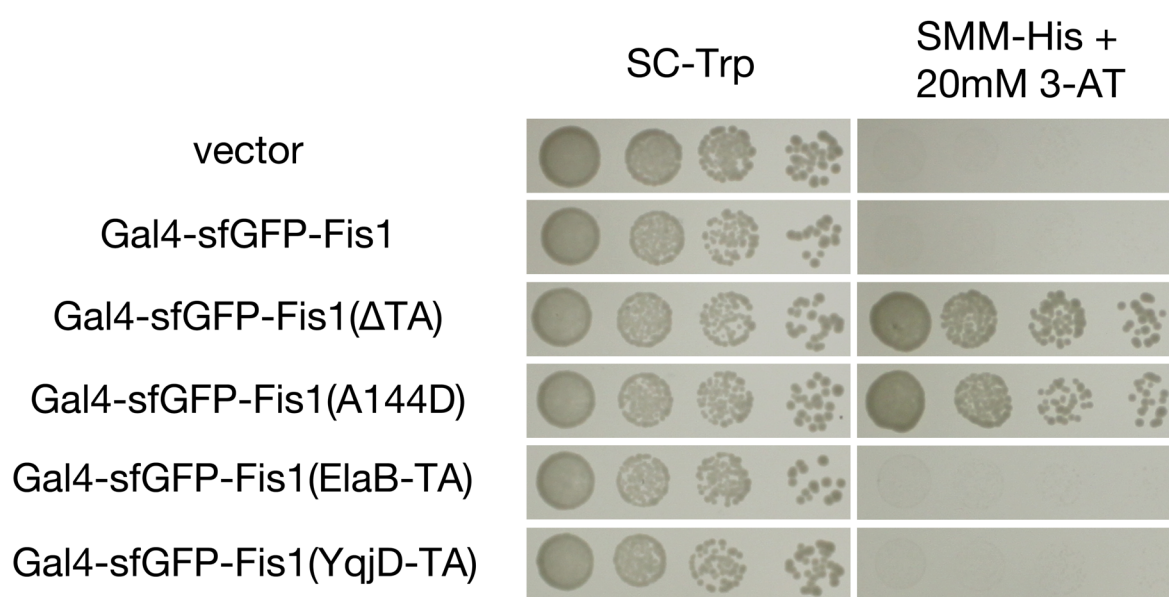

Figure 2

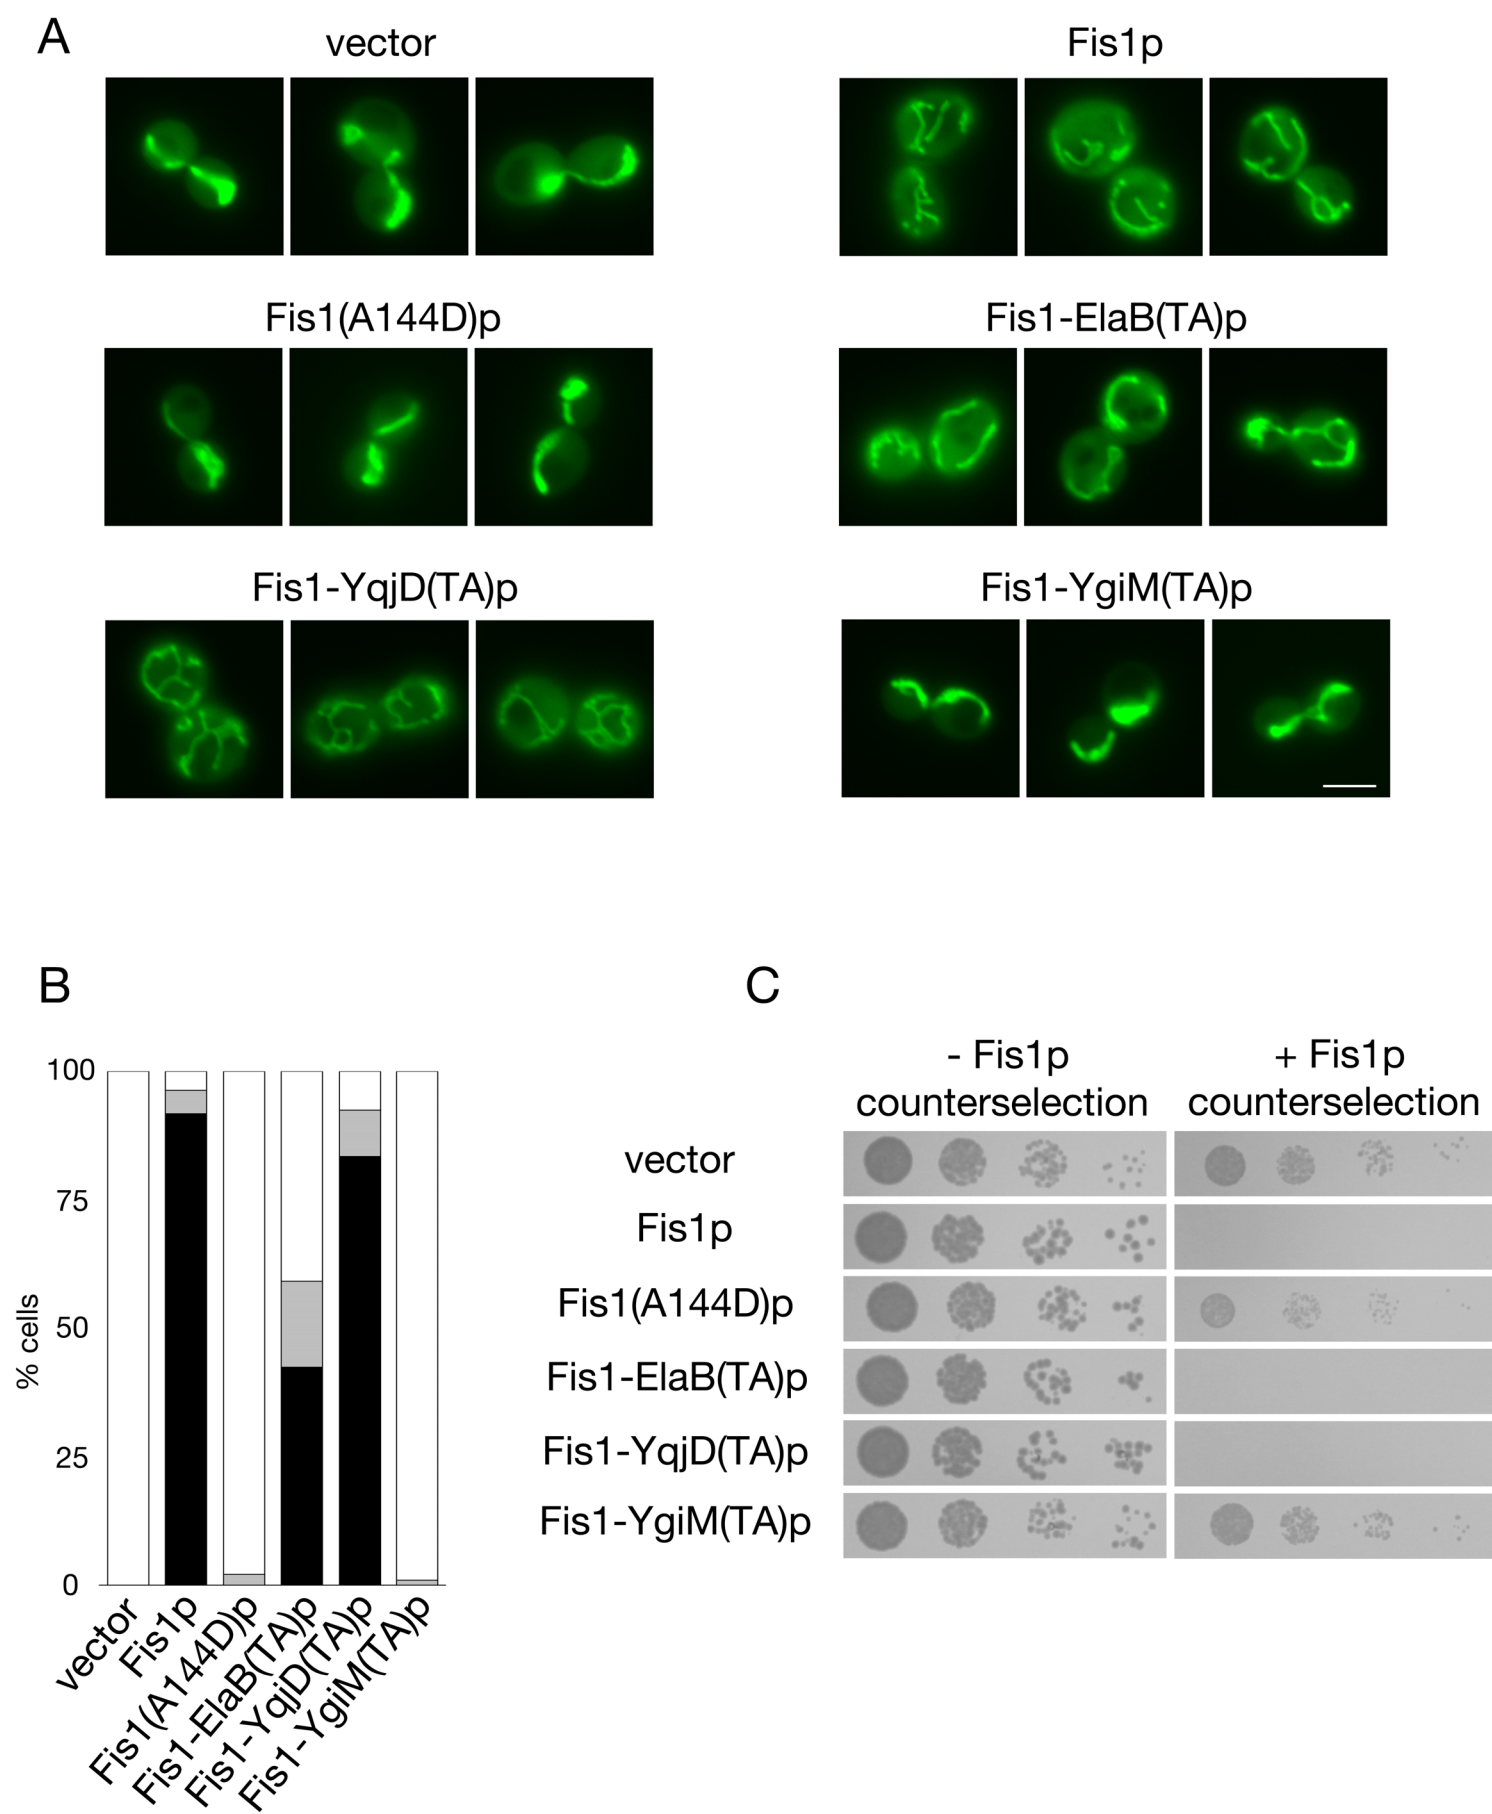

Figure 3

|        |      |                                                                   |
|--------|------|-------------------------------------------------------------------|
| P15286 | Fik  | <u>PALWILLVAIILMLVWLVR</u> <sup>+</sup>                           |
| P64622 | YhdV | <u>TAGAIAGGAAAVAGLTMGIILSK</u> <sup>+</sup>                       |
| P27129 | RfaJ | <u>LVQHHYISGIIAGVCYLCKYYRK</u> <sup>++ ++</sup>                   |
| P77381 | DjlB | <u>LGIIKIIFYIFIFAGLIGKILHLFG</u>                                  |
| P0AAJ3 | FdnH | <u>LAAAGFIATFAGLIFHYIGIGPNKEVDDDEEDHHE</u> <sup>+ - - - - -</sup> |
| P32711 | NrfF | <u>TGQTLVLWALPVVLLLLMALILWRVRAKR</u> <sup>++ ++</sup>             |
| P0CB62 | YmiA | <u>WLAVFLGSALFWVVALLIWKVWG</u>                                    |
| P0ADT8 | YgiM | <u>WFMYGGGVLGLGLLLGLVPLHIPSRRKRKDRWMN</u> <sup>++++ - +</sup>     |
| P0ADQ7 | YgaM | <u>GTAAAVGIFIGALLSMRKS</u> <sup>++</sup>                          |
| Q46927 | TcdA | <u>ASGFGAATMVTATFGFVAVSHALKKMMAKAARQG</u> <sup>++ + +</sup>       |
| P0AEH5 | ElaB | <u>PWQGIGVGAAVGLVLGLLLARR</u> <sup>++</sup>                       |
| P64581 | YqjD | <u>WTGVGIGAAIGVVLGVLLSRR</u> <sup>++</sup>                        |
| P40515 | Fis1 | <u>LKGWWAGGVLGAVAVASFFLRNKRR</u> <sup>+ +++</sup>                 |

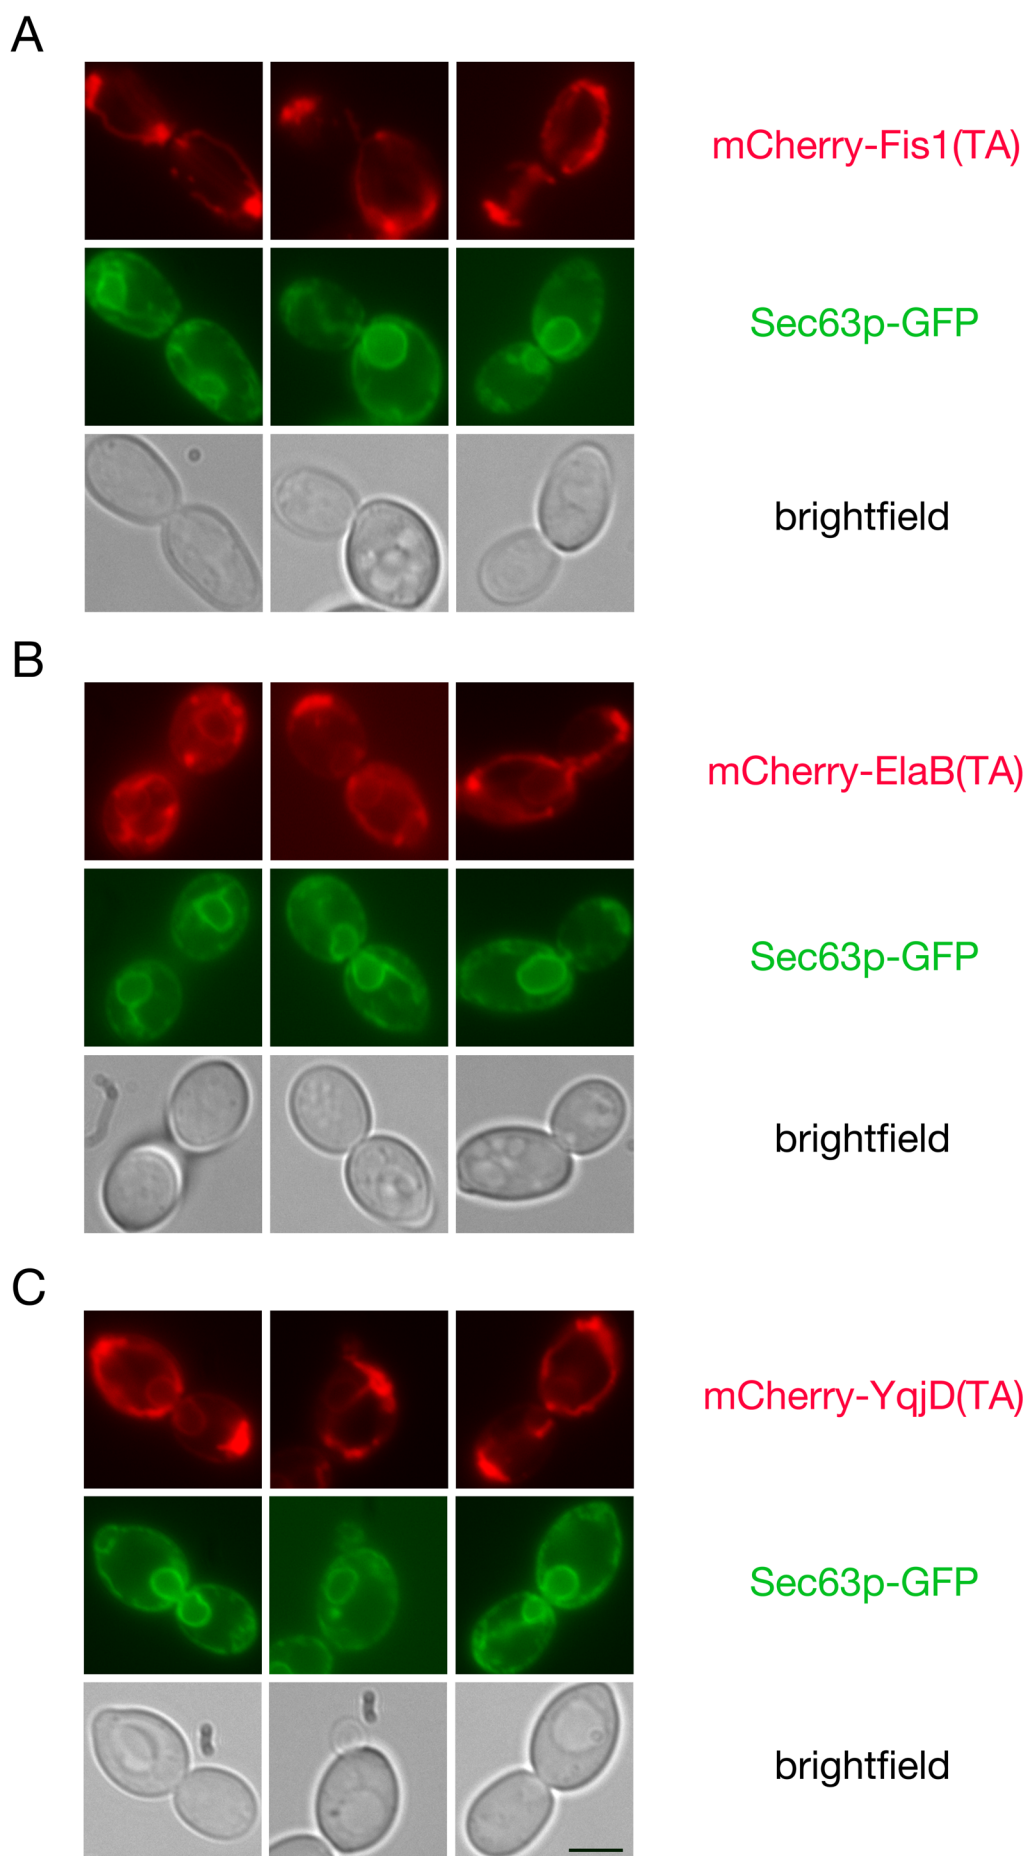

Supplemental Figure 2

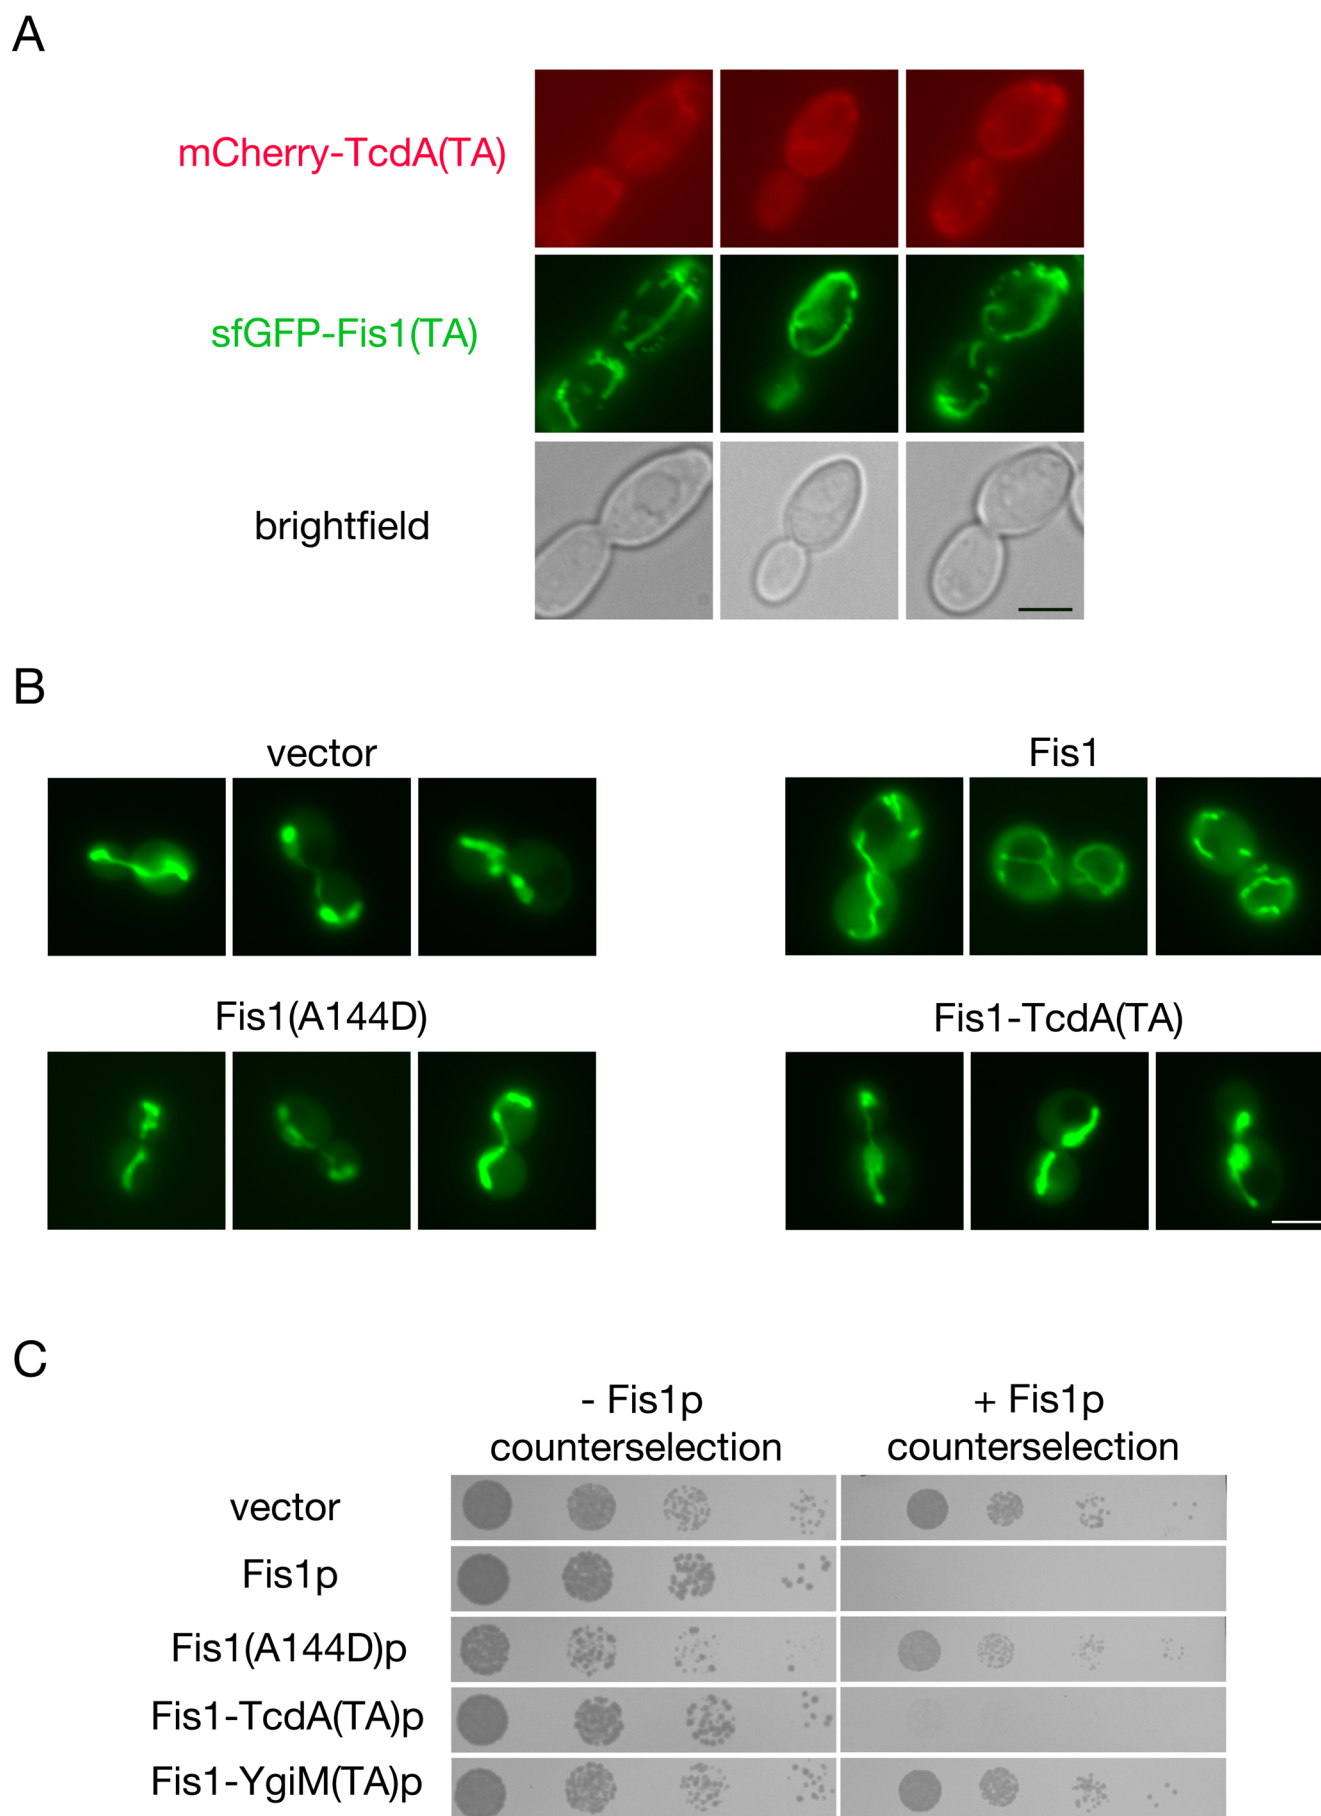



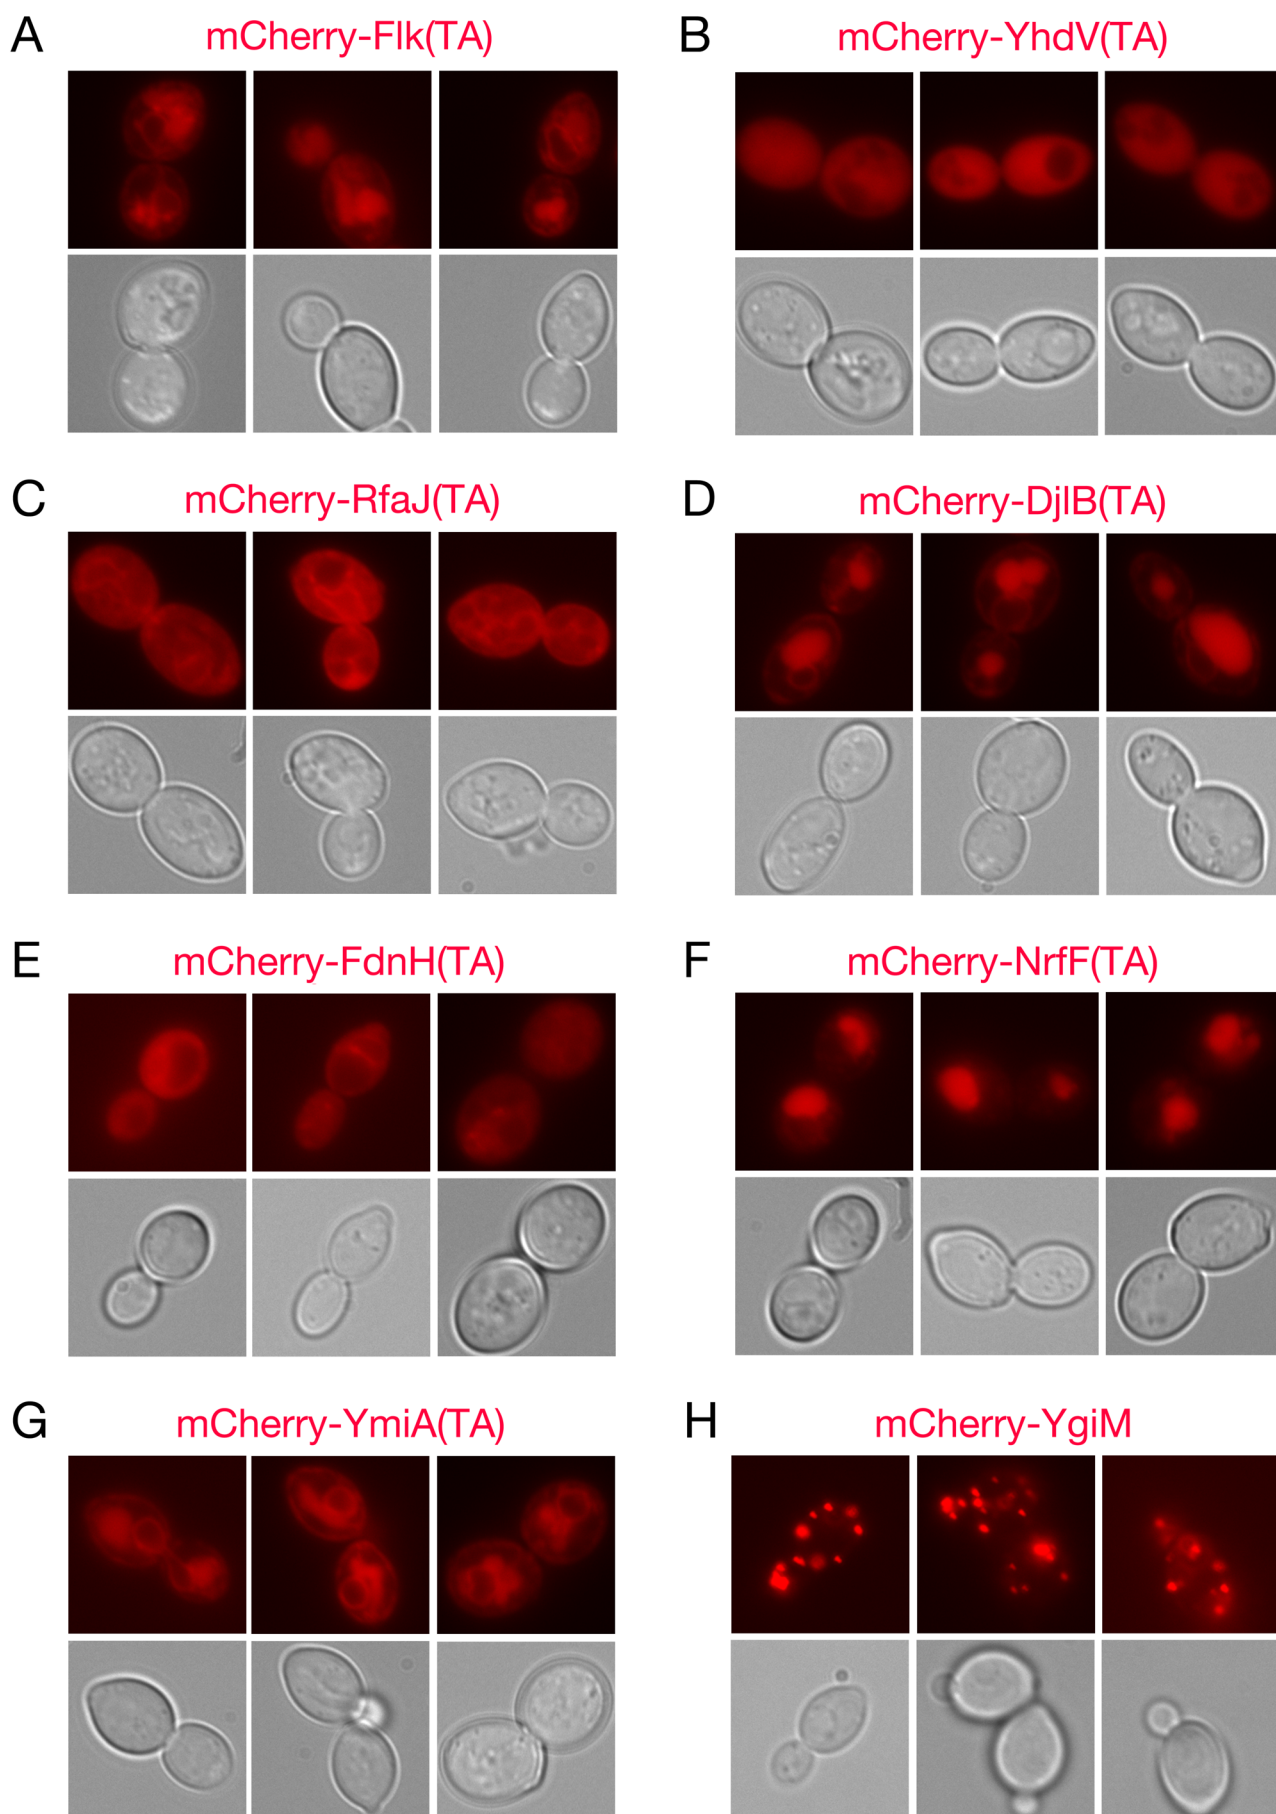

Supplemental Figure 4
